# Supplementary material for: The Spasmolytic, Bronchodilator, and Vasodilator Activities of Parmotrema perlatum Are Explained by Anti-Muscarinic and Calcium Antagonistic Mechanisms
Source: Molecules. 2021 Oct 20;26(21):6348. doi: 10.3390/molecules26216348 (PMC8588472; doi:10.3390/molecules26216348)
Supplement: Supplementary file 1 [file molecules-26-06348-s001.zip › molecules-1397479-Supplementary Materials-new version.pdf]

| Sr.no | Test Performed | Results  | Symbolic representation |
|-------|----------------|----------|-------------------------|
| 1     | Alkaloid       | Positive | + +                     |
| 2     | Flavonoids     | Positive | + +                     |
| 3     | Saponins       | Positive | +                       |
| 4     | Tanins         | Positive | +                       |
| 5     | Terpenes       | Positive | +                       |
| 6     | Sterols        | Positive | +                       |
| 7     | Anthraquinones | Negative | -                       |

Table S1. Data obtained after the phytochemical analysis.

| S. No | Response                      | Animals          |                          |                          |                          |                          |
|-------|-------------------------------|------------------|--------------------------|--------------------------|--------------------------|--------------------------|
|       |                               | Before treatment | After treatment (1 g/kg) | After treatment (2 g/kg) | After treatment (4 g/kg) | After treatment (6 g/kg) |
| 1     | <b>Alertness</b>              | Normal           | Normal                   | Normal                   | Normal                   | Normal                   |
| 2     | <b>Grooming</b>               | Absent           | Absent                   | Absent                   | Absent                   | Absent                   |
| 3     | <b>Restlessness</b>           | Absent           | Absent                   | Absent                   | Absent                   | Absent                   |
| 4     | <b>Touch response</b>         | Normal           | Normal                   | Normal                   | Normal                   | Normal                   |
| 5     | <b>Gastrointestinal spasm</b> | Absent           | Absent                   | Absent                   | Absent                   | Absent                   |
| 6     | <b>Food intake</b>            | Normal           | Normal                   | Normal                   | Normal                   | Normal                   |
| 7     | <b>Water intake</b>           | Normal           | Normal                   | Normal                   | Normal                   | Normal                   |
| 8     | <b>Mortality</b>              | N/A              | Nil                      | Nil                      | Nil                      | Nil                      |
| 9     | <b>Urination</b>              | Normal           | Normal                   | Normal                   | Normal                   | Normal                   |
| 10    | <b>Salivation</b>             | Normal           | Normal                   | Normal                   | Normal                   | Normal                   |
| 11    | <b>Piloerection</b>           | Absent           | Absent                   | Absent                   | Absent                   | Absent                   |

Table S2. Acute toxicity study of Pp.Cr.

| Part used                   | Treatments                                                                | EC <sub>50</sub> |
|-----------------------------|---------------------------------------------------------------------------|------------------|
| Rabbit jejunum preparation  | Pp.Cr (0.01–1 mg/mL) relaxed rhythmic spontaneous contraction             | 1.15 mg/mL       |
|                             | Dicyclomine relaxed rhythmic spontaneous contraction                      | 0.95 µM          |
|                             | Dantrolene relaxed rhythmic spontaneous contraction                       | 1.1 µM           |
|                             | Pp.Cr (0.01–1 mg/mL) relaxed K <sup>+</sup> (80 mM)- induced contractions | 1.96 mg/mL       |
|                             | Pp.Cr (0.01–1 mg/mL) relaxed Cch(1µM)-induced contractions                | 0.55 mg/mL       |
|                             | Dicyclomine relaxed Cch(1µM)-induced contractions                         | 0.35 µM          |
|                             | Dicyclomine relaxed K <sup>+</sup> (80 mM)-induced contractions           | 1.45 µM          |
|                             | Dantrolene relaxed Cch(1µM)-induced contractions                          | 1.65 µM          |
|                             | Dantrolene relaxed K <sup>+</sup> (80 mM)-induced contractions            | 0.28 µM          |
| Rabbit tracheal preparation | Pp.Cr (0.01–3 mg/mL) relaxed K <sup>+</sup> (80 mM)- induced contractions | 1.65 mg/mL       |
|                             | Pp.Cr (0.01–1 mg/mL) relaxed Cch(1µM)-induced contractions                | 0.9 mg/mL        |
|                             | Dicyclomine relaxed Cch(1µM)-induced contractions                         | 0.6 µM           |
|                             | Dicyclomine relaxed K <sup>+</sup> (80 mM)-induced contractions           | 3.30 µM          |
|                             | Dantrolene relaxed Cch(1µM)-induced contractions                          | 4.15 µM          |
|                             | Dantrolene relaxed K <sup>+</sup> (80 mM)-induced contractions            | 0.2 µM           |
| Rabbit aorta preparation    | Pp.Cr (0.01–1 mg/mL) relaxed K <sup>+</sup> (80 mM)- induced contractions | 0.32 mg/mL       |
|                             | Pp.Cr (0.01–1 mg/mL) relaxed phenylephrine (1 µM) induced contractions    | 0.82 mg/mL       |
|                             | Verapamil relaxed K <sup>+</sup> (80 mM)- induced contractions            | 0.17 µM          |
|                             | Verapamil relaxed phenylephrine (1 µM) induced contractions               | 1.98 µM          |
|                             | Dantrolene relaxed K <sup>+</sup> (80 mM)- induced contractions           | 0.21 µM          |
|                             | Dantrolene relaxed phenylephrine (1 µM) induced contractions              | 2.3 µM           |

Table S3. Obtained EC<sub>50</sub> values of Plant extract

Table S4. Dosing protocols of plant extract.

| Extract | Cumulative | Bolus  | Cumulative | Bolus  | Cumulative | Bolus  | Cumulative | Bolus  | Mg/ml |
|---------|------------|--------|------------|--------|------------|--------|------------|--------|-------|
| 3       | 17 µl      | 17 µl  | 33 µl      | 33 µl  | 50 µl      | 50 µl  | 66 µl      | 66 µl  | 0.01  |
|         | 33 µl      | 50 µl  | 66 µl      | 100 µl | 99 µl      | 150 µl | 132 µl     | 200 µl | 0.03  |
| 30      | 12 µl      | 17 µl  | 23 µl      | 33 µl  | 36 µl      | 50 µl  | 46 µl      | 66 µl  | 0.1   |
|         | 33 µl      | 50 µl  | 66 µl      | 100 µl | 99 µl      | 150 µl | 132 µl     | 200 µl | 0.3   |
| 300     | 12 µl      | 17 µl  | 23 µl      | 33 µl  | 36 µl      | 50 µl  | 46 µl      | 66 µl  | 1     |
|         | 33 µl      | 50 µl  | 66 µl      | 100 µl | 99 µl      | 150 µl | 132 µl     | 200 µl | 3     |
|         | 33 µl      | 83 µl  | 66 µl      | 166 µl | 99 µl      | 250 µl | 132 µl     | 266 µl | 5     |
|         | 83 µl      | 166 µl | 166 µl     | 333 µl | 250 µl     | 500 µl | 333 µl     | 666 µl | 10    |

Dosing protocols of positive drugs (standard drugs)

| Stock solution    | 5 ml (Bath) | 10ml (Bath) | 15 ml (Bath) | 20 ml (Bath) | Final bath Conc.            |
|-------------------|-------------|-------------|--------------|--------------|-----------------------------|
| Ach ( $10^{-4}$ ) | 15 µl       | 30 µl       | 45 µl        | 60 µl        | $3 \times 10^{-7}$ (0.3µM ) |
| Cch ( $10^{-4}$ ) | 50 µl       | 100 µl      | 150 µl       | 200 µl       | 1 µM                        |
| PE ( $10^{-4}$ )  | 50 µl       | 100 µl      | 150 µl       | 200 µl       | 1 µM                        |
| KCl (2.5M)        | 160 µl      | 320 µl      | 480 µl       | 640 µl       | 80mM                        |
